# Supplementary material for: Synergistic surface modulation with isotropic 2D GA2PbI4 and Lewis base enhances efficiency and stability of perovskite solar cells
Source: Royal Society of Chemistry journal article supplement (doi:10.1039/d4ta03904a), 2024-01-01
Supplement: d4ta03904a1.pdf [file d4ta03904a1.pdf]

Supporting Information for

**Synergistic Surface Modulation with Isotropic 2D  $\text{GA}_2\text{PbI}_4$  and Lewis Base Enhances Efficiency and Stability of Perovskite Solar Cells**

Peiquan Song,<sup>‡a</sup> Lina Shen,<sup>‡a</sup> Lingfang Zheng,<sup>a</sup> Enlong Hou,<sup>a</sup> Peng Xu,<sup>a</sup> Jinxin Yang,<sup>a</sup>  
Chengbo Tian,<sup>a</sup> Zhanhua Wei,<sup>\*a</sup> Xianguang Zhang,<sup>\*b</sup> and Liqiang Xie<sup>\*a</sup>

<sup>a</sup>Xiamen Key Laboratory of Optoelectronic Materials and Advanced Manufacturing, Institute of Luminescent Materials and Information Displays, College of Materials Science and Engineering, Huaqiao University, Xiamen, 361021, China

E-mail: lqxie@hqu.edu.cn, [weizhanhua@hqu.edu.cn](mailto:weizhanhua@hqu.edu.cn)

<sup>b</sup>Key Laboratory of Green Chemical Media and Reactions, Ministry of Education, Collaborative Innovation Center of Henan Province for Green Manufacturing of Fine Chemicals, College of Chemistry and Chemical Engineering, Henan Normal University, Xinxiang, 453007, China

E-mail: zhangxianguang@htu.edu.cn

<sup>‡</sup> Authors with equal contributions.

## Materials

Methylammonium iodide (MAI), methylammonium bromide (MABr), and formamidinium iodide (FAI) were bought from Greatcell Solar. Lead iodide ( $\text{PbI}_2$ , 99.99%) and guanidinium iodide (GAI, >97%) were purchased from TCI. Methylamine hydrochloride (MACl) was obtained from Xi'an Polymer Light Technology Corporation. 2,2',7,7'-tetrakis[N,N-di(4-methoxyphenyl)amino]-9,9-spirobifluorene (Spiro-OMeTAD, 99%) were bought from Shenzhen Feiming Technology Corporation. [(2,6-(4,8-bis(5-(2-ethylhexyl)thiophene-2-yl)-benzo[1,2-b:4,5-b']dithiophene))-alt-(5,5-(1',3'-di-2-thienyl-5',7'-bis(2-ethylhexyl)benzo[1',2'-c:4',5'-c']dithiophene-4,8-dione)] (PBDB-T, 99%) was purchased from Solarmer. Hydrochloric acid (HCl) was purchased from Shanghai Hushi Corporation. Guanidinium acetate (GAAC, 99%), formamidinium acetate (FAAC, 99%), urea, thioglycolic acid (TGA, 98%),  $\text{SnCl}_2 \cdot 2\text{H}_2\text{O}$  (>99.995%), N, N-dimethylformamide (DMF, anhydrous, 99.8%), dimethyl sulfoxide (DMSO, anhydrous, 99.9%), isopropanol (IPA, anhydrous, 99%), chlorobenzene (CB, 99.8%), acetonitrile (anhydrous, 99.8%), bis(trifluoromethane) sulfonimide lithium salt (99.95%) and 4-tert-butylpyridine (TBP, 96%) were obtained from Sigma-Aldrich.

## Device Fabrication:

*Electron transport layer deposition:* First, FTO glass substrates were cleaned by sequential ultrasonic treatment in detergent, deionized water, acetone, isopropyl alcohol, and ethanol. The cleaned substrates were then treated for 15 minutes with  $\text{O}_2$  plasma. The chemical bath deposition (CBD) solution was prepared by mixing 1250 mg of urea, 1250  $\mu\text{L}$  of HCl, 25  $\mu\text{L}$  of TGA, and 275 mg of  $\text{SnCl}_2 \cdot 2\text{H}_2\text{O}$  into 100 mL of deionized water. The FTO substrates and the CBD solution were loaded onto a glass reaction vessel and reacted at 97 °C for 5 hours. Then, the FTO substrates were taken out from the CBD solution, rinsed with deionized water, and subjected to ultrasonication in IPA for 5 minutes. Finally, it was annealed on a hotplate at 170°C for 1 hour.

*Perovskite absorber deposition:* On the CBD  $\text{SnO}_2$  layer, 1.5 M  $\text{PbI}_2$  with 5% CsI (dissolved in DMF/DMSO=9/1, v/v) was spin-coated at 2,500 rpm for 30 s and annealed at 70 °C for 1 minute in an  $\text{N}_2$ -filled glove box. Then, a solution of organic salts (120 mg of FAI, 20 mg of MAI, 3 mg of MABr, and 5 mg of MACl dissolved in 2 mL of IPA) was spin-coated at 1,500 rpm for 30 s and then annealed at 150 °C for 15 minutes in the ambient air (30% relative humidity). After cooling down to room temperature, GAAC with a concentration of 2 mg  $\text{mL}^{-1}$  in IPA was spin-coated at 4,000 rpm for 30 s. Subsequently, the sample was heated on a hotplate at 100°C for 10 minutes.

*Hole transport layer (HTL) and metal electrode deposition:* The HTL solution consists of 72.3 mg of Spiro-OMeTAD, 17.5  $\mu\text{L}$  of lithium bis(trifluoromethane) sulfonamide salt (520 mg  $\text{dmL}^{-1}$  in acetonitrile), and 28.8  $\mu\text{L}$  of 4-tertbutylpyridine in 1 mL of chlorobenzene. The prepared HTL solution was spin-coated on the perovskite films at 4,000 rpm for 30 s. For the thermal stability test, the Spiro-OMeTAD solution was mixed with PBDB-T solution (5mg  $\text{mL}^{-1}$  dissolved in chlorobenzene) at a volume ratio of 4: 1. Finally, A 80 nm Ag was deposited via thermal evaporation to complete the solar cell device.

## Characterization

Photovoltaic characteristics were measured using a Keithley 2400 source meter under simulated AM1.5G irradiation under an Xe lamp simulator (Enli SS-F5). The light intensity was calibrated to 1 sun illumination using a NREL-calibrated silicon photodiode with a KG5 filter. The  $J$ - $V$  curves of all devices were tested at a scan rate of 40  $\text{mV s}^{-1}$  with an aperture mask (0.12  $\text{cm}^2$ ). The reverse scan was from  $V_{\text{OC}}$  to  $J_{\text{SC}}$  (1.25 V to 0 V), and the forward scan was from  $J_{\text{SC}}$  to  $V_{\text{OC}}$  (0 V to 1.25 V).  $^{13}\text{C}$  NMR spectra were measured using a Bruker Avance III 500 MHz NMR spectrometer. UV-Vis absorption, photoluminescence, and electroluminescent spectra were collected on OceanInsight Spectrometer. Time-resolved photoluminescence and temperature-dependent photoluminescence measurements were carried out using the FLS1000 (Edinburgh Instrument, UK). X-ray diffraction (XRD) patterns were taken with  $\text{Cu } K_{\alpha}$  radiation on a Rigaku-SmartLab X-ray diffraction instrument. Grazing-incidence wide-angle X-ray scattering (GIWAXS) patterns were acquired at the XEUSS WAXS/SAXS system (Xenocs, France). X-ray photoelectron spectroscopy data were obtained from the Thermo Scientific K-Alpha+. An  $\text{Al } K_{\alpha}$  (1486.7 eV) source gun with 400  $\mu\text{m}$  X-ray spot was used. The pass energy was 30 eV and the energy step was 0.05 eV. Ultraviolet photoelectron spectroscopy (UPS) measurements were carried out on a Thermo-Fisher ESCALab Xi+ system at a bias of -5 V using a  $\text{He-I}_{\alpha}$  (21.22 eV) UV light source. PL mapping was performed on Leica TCS SP8 Confocal laser scanning microscopy. The excitation wavelength was 488 nm, the detection wavelength range was 790-800 nm, and the fluorescence signal was probed by a PMT detector with a gain value constant at 400. Scanning electron microscope (SEM) images were obtained from a JEOL-JSM-7610F-plus field-emission scanning electron microscopy. The transient photovoltage (TPV) measurement transient time is 1  $\mu\text{s}$ , potentiostat setting time is 0.2  $\mu\text{s}$ , and the mode of light intensity course is on-off. TPV, Mott-Schottky plot is obtained by Capacitance-voltage test from 0  $\rightarrow$  1.2 V under 10 KHz, and admittance spectroscopy analysis acquired by Capacitance-frequency from 1MHz  $\rightarrow$  1Hz. TPV, Capacitance-voltage, Capacitance-frequency

measurements were carried out on a Zahner electrochemical workstation. The admittance spectroscopy analysis The conductivity of the perovskite films at different temperatures was measured by CHI-660e electrochemical workstation. Operational stability data was tracked on a solar cell stability test system by Suchow DeRui Corporation.

### Supplementary Note 1: Calculation of the trap density ( $N_t$ ).

The  $N_t$  can be calculated using Capacitance-frequency and Capacitance-voltage measured in

the dark state, and estimated by a formula:  $N_t(E_\omega) = -\frac{\omega}{K_B T} \times \frac{V_{bi}}{eW} \times \frac{dC}{d\omega}$ . Where  $\omega$  is the angular frequency of the ac signal,  $K_B$  is Boltzmann constant,  $T$  is temperature,  $K_B T = 0.026$  eV in room temperature;  $V_{bi}$  is the built-in voltage in the heterojunction,  $W$  is the width of the depletion

layer;  $C$  is capacitance. A Mott-Schottky plot:  $\frac{A^2}{C^2} = \frac{2(V_{bi} - V)}{q\epsilon\epsilon_0 N}$  describes a straight line where the intersection on the bias axis determines  $V_{bi}$  and the slope gives the impurity doping density  $N$ .

The depletion layer width  $W$  can be calculated by  $W = \sqrt{\frac{2\epsilon\epsilon_0 V_{bi}}{qN}}$ . The energy  $E_\omega$  can be estimated

by the formula  $E_\omega = K_B T \times \ln \frac{2\beta_p N_v}{\omega}$ . Where  $\beta_p$  is capture coefficient of hole,  $N_v$  is the effective density of states in the valence band. The  $\beta_p$  is  $10^{-8}$  cm<sup>3</sup>/s, and the  $N_v$  is  $2.524 \times 10^{19}$ /cm<sup>3</sup> for the perovskite film based FAPbI<sub>3</sub>.<sup>1,2</sup>

### DFT calculations

To calculate the adsorption energy, the periodic structures were calculated in the Vienna ab initio simulation package (VASP) using the Perdew-Burke-Ernzerhof function with the generalized gradient approximation.<sup>3</sup> The DFT-D3 method was employed to correct the Van der Waals interactions of the system. The spin polarization calculation was carried out in the geometric optimization. The plane-wave basis cutoff was set as 450 eV, the energy criterion was set as  $10^{-5}$  eV, and the force criterion was set as 0.02 eV/Å. The adsorption structure was studied by using a three-layer ( $2 \times 2$ ) perovskite supercell and a 15 Å vacuum layer. The bottom layer of perovskite was fixed. A  $3 \times 3 \times 1$  Monkhorst-Pack k-point sampling grid was used to optimize the geometrical structure.

The binding energies were calculated by the following equation:

$$E = E_{\text{tot}} - E_{\text{substrate}} - E_{\text{mole}},$$

where  $E_{\text{tot}}$ ,  $E_{\text{substrate}}$ , and  $E_{\text{mole}}$  are the total electronic energies of the total system, the perovskite substrate, and the ion, respectively. The structure of them was based on the optimized structure of the system.

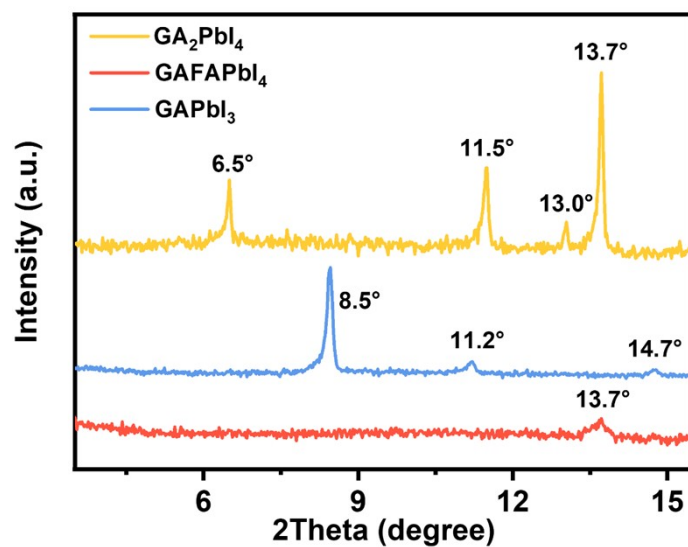

Fig. S1 XRD patterns of the  $\text{GA}_2\text{PbI}_4$ ,  $\text{GAFAPbI}_4$ , and  $\text{GAPbI}_3$  perovskite films.

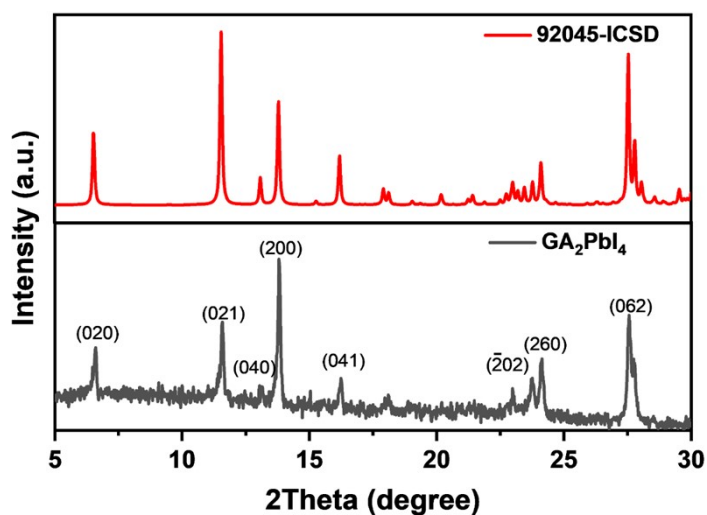

Fig. S2 XRD patterns of the 2D  $\text{GA}_2\text{PbI}_4$  films and the single crystal ICSD card.<sup>4</sup>

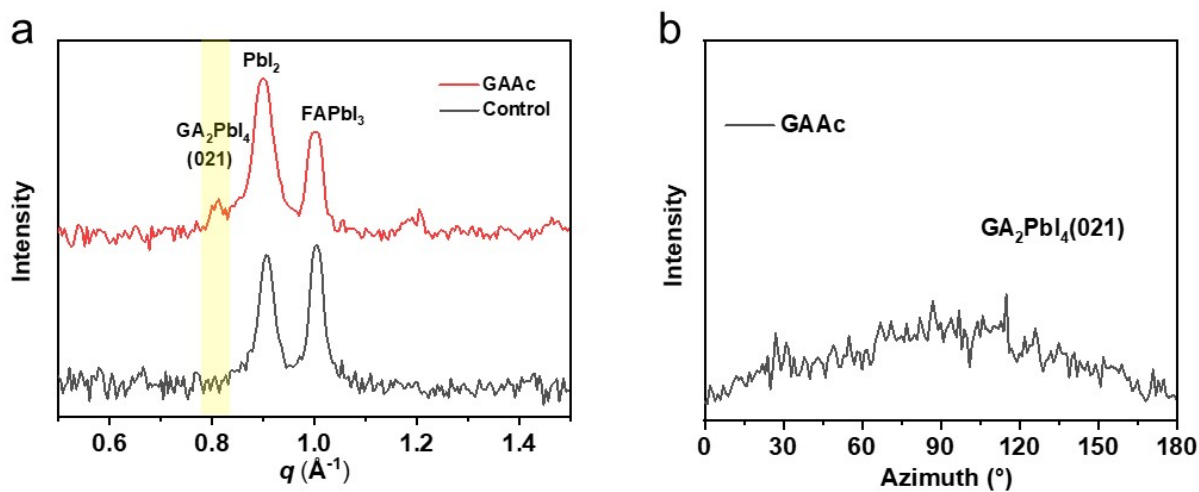

Fig. S3 (a) GIWAXS profile of the control and GAAc-treated perovskite films. (b) The azimuthal integration profile of the (021) diffraction of  $\text{GA}_2\text{PbI}_4$  from the GIWAXS pattern.

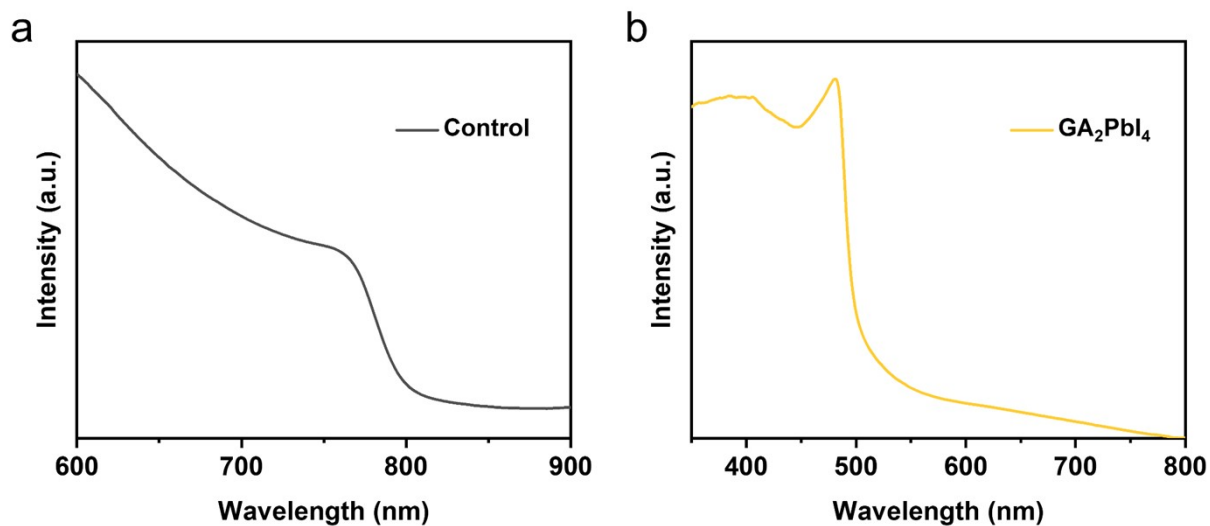

**Fig. S4** UV-vis absorption spectrum of spin-coated (a) Control and (b) GA<sub>2</sub>PbI<sub>4</sub> perovskite film on the glass substrate.

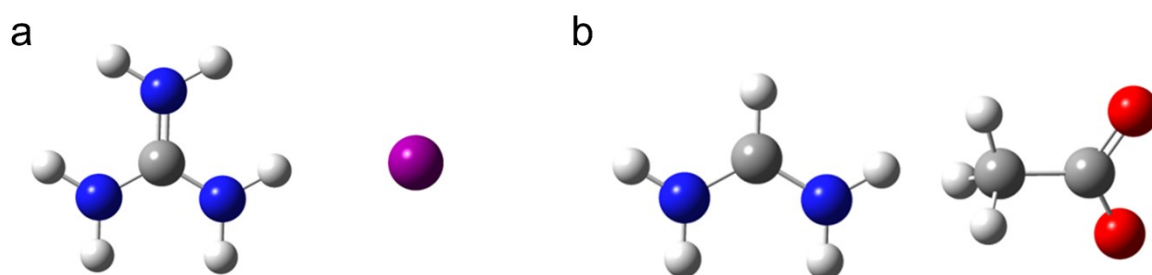

**Fig. S5** Molecular structure of (a) GAI and (b) FAc.

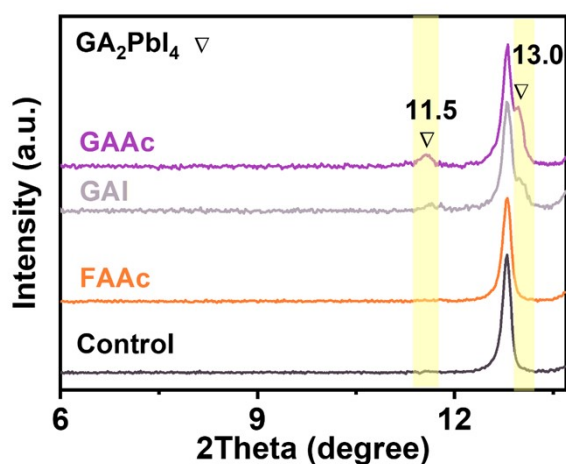

**Fig. S6** XRD patterns of the control, GAI, FAc, and GAAC-treated perovskite films.

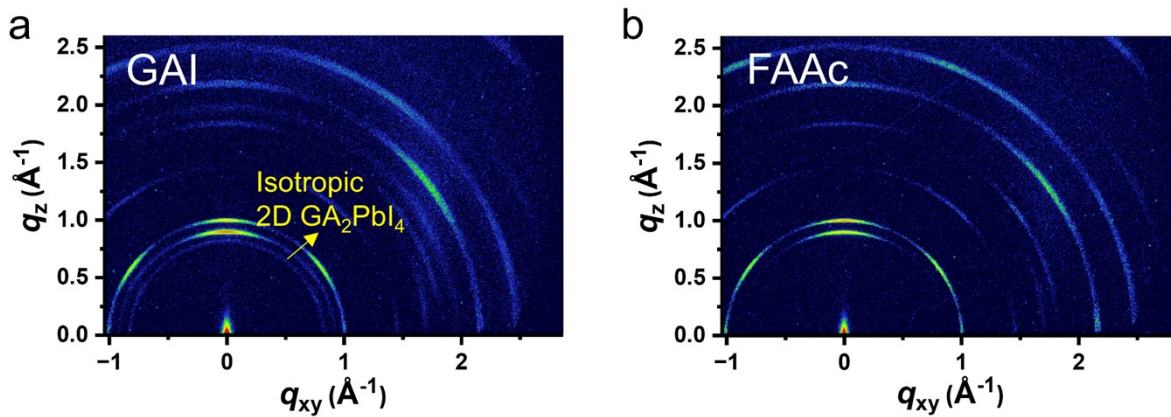

**Fig. S7** GIWAXS patterns of (a) GAI and (b) FAAc-treated perovskite films.

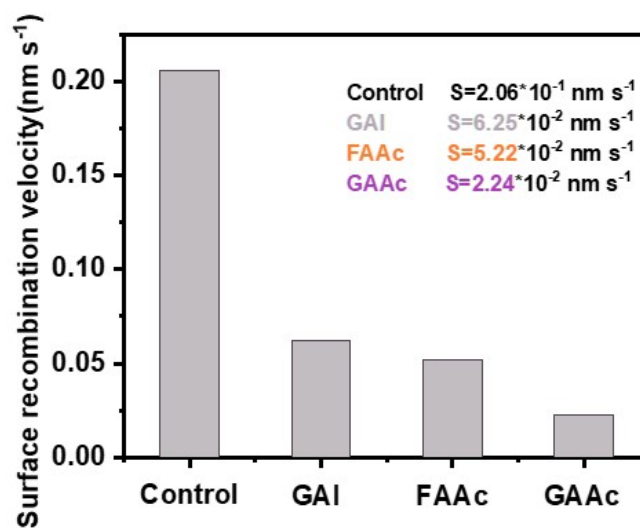

**Fig. S8** Surface recombination velocity of the control, GAI, FAAc, and GAAC treated perovskite films.

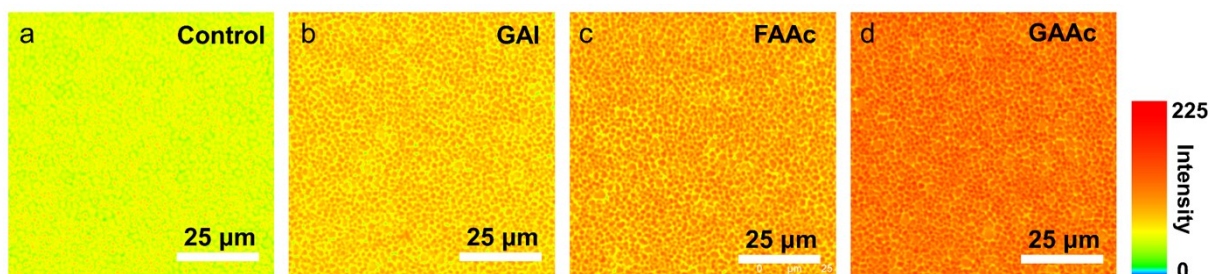

**Fig. S9** PL-Mapping images of the (a) control, (b) GAI, (c) FAAc, and (d) GAAC treated perovskite films.



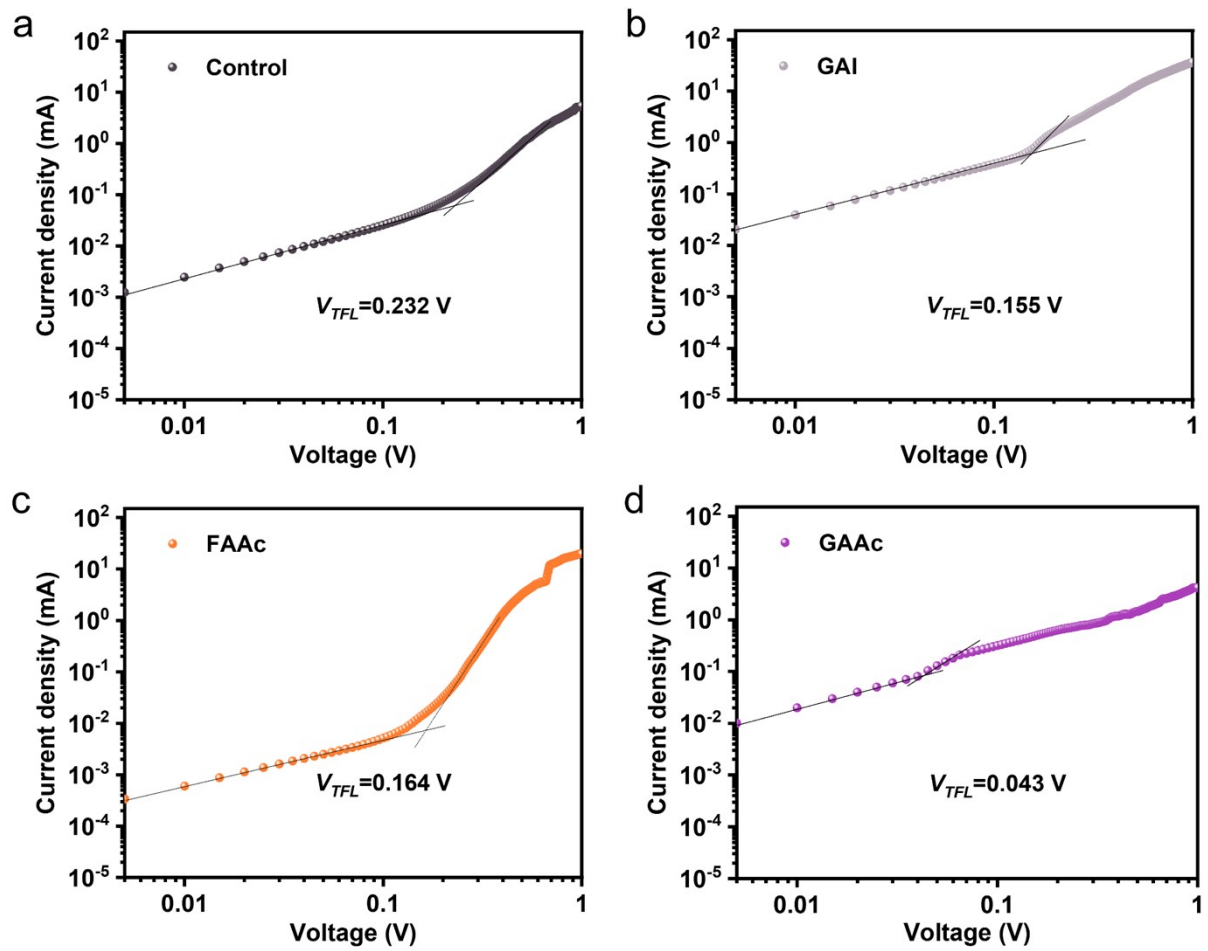

**Fig. S10** SCLC measurements of the electron-only device with the device architecture of ITO/SnO<sub>2</sub>/perovskite/PCBM/Ag based on the (a) control, (b) GAI, (c) FAAC, and (d) GAAC treated perovskites.

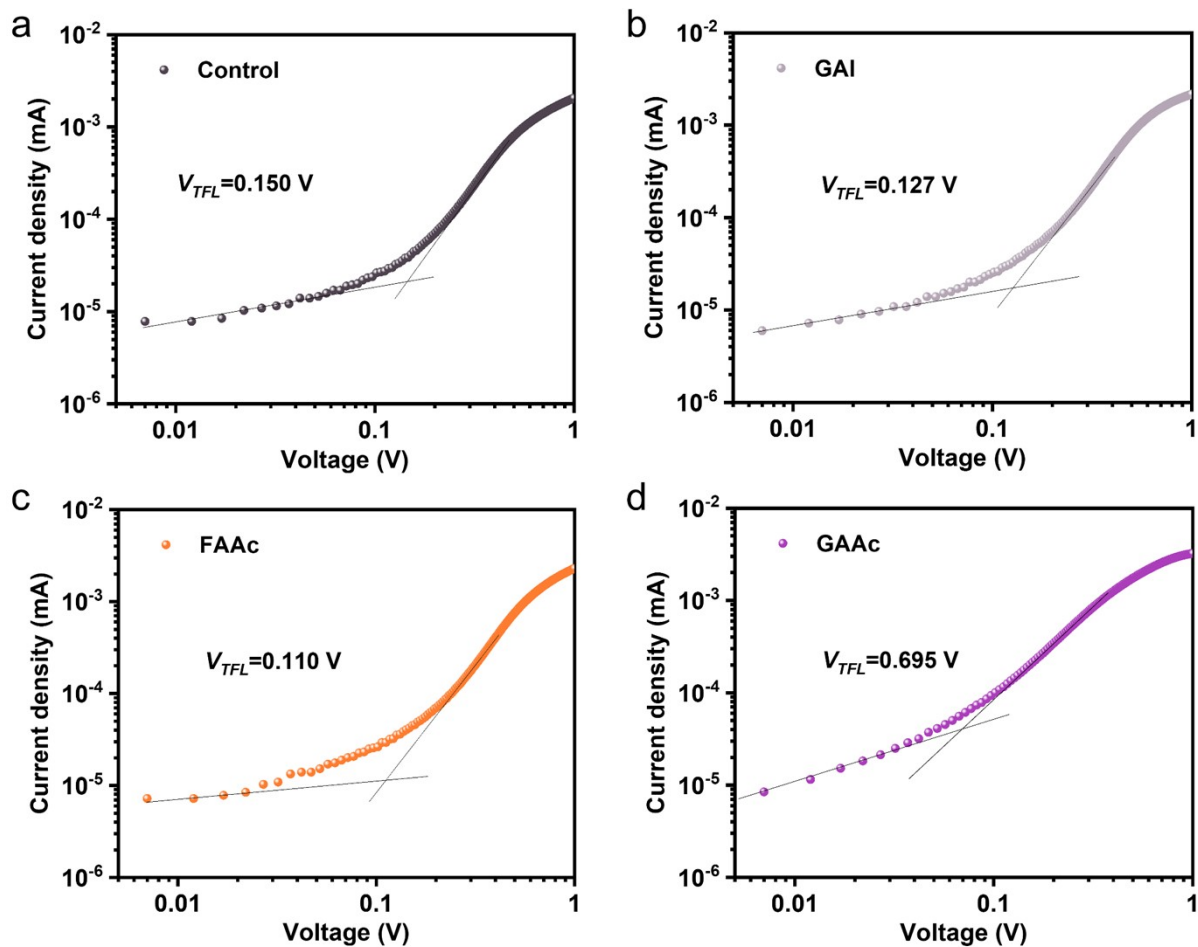

**Fig. S11** SCLC measurements of the hole-only devices with the architecture of ITO/PEDOT:PSS/perovskite/PTAA/Ag based on the (a) control, (b) GAI, (c) FAAc, and (d) GAAC treated perovskites.

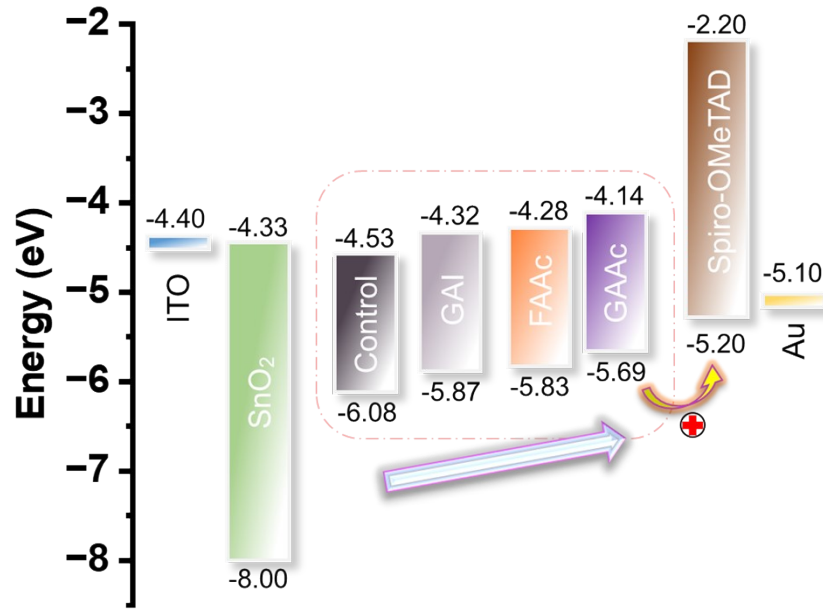

**Fig. S12** Energy band diagram of solar cell devices based on the control, GAI, FAc, and GAc treated perovskites.

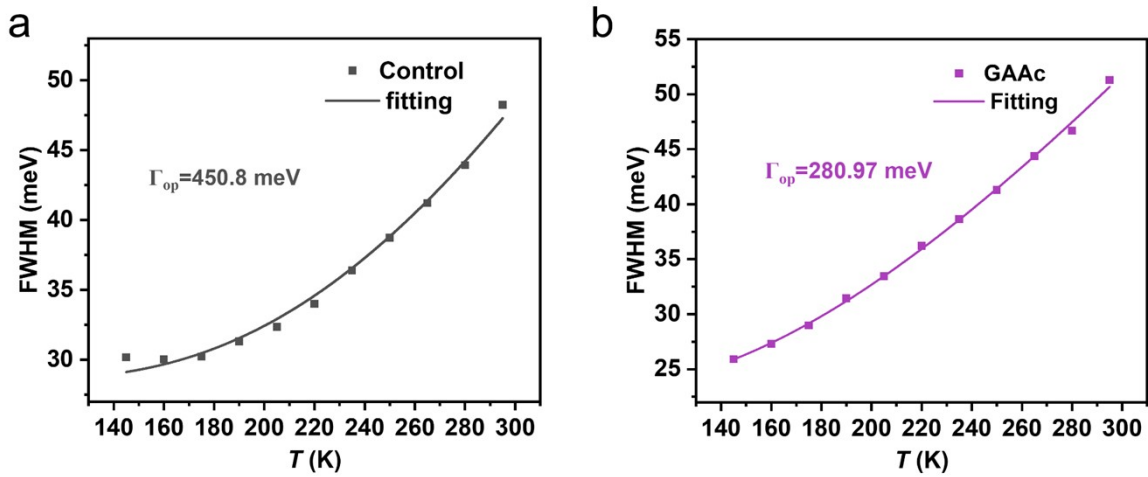

**Fig. S13** The FWHMs of the (a) control and (b) GAc treated perovskites as a function of temperature.

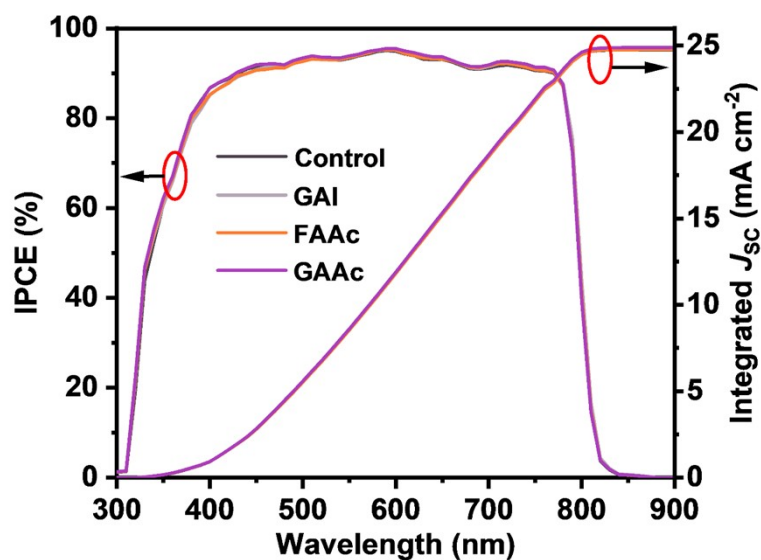

Fig. S14 EQE and integrated  $J_{SC}$  of the control, GAI, FAAC, and GAAC treated PSCs.

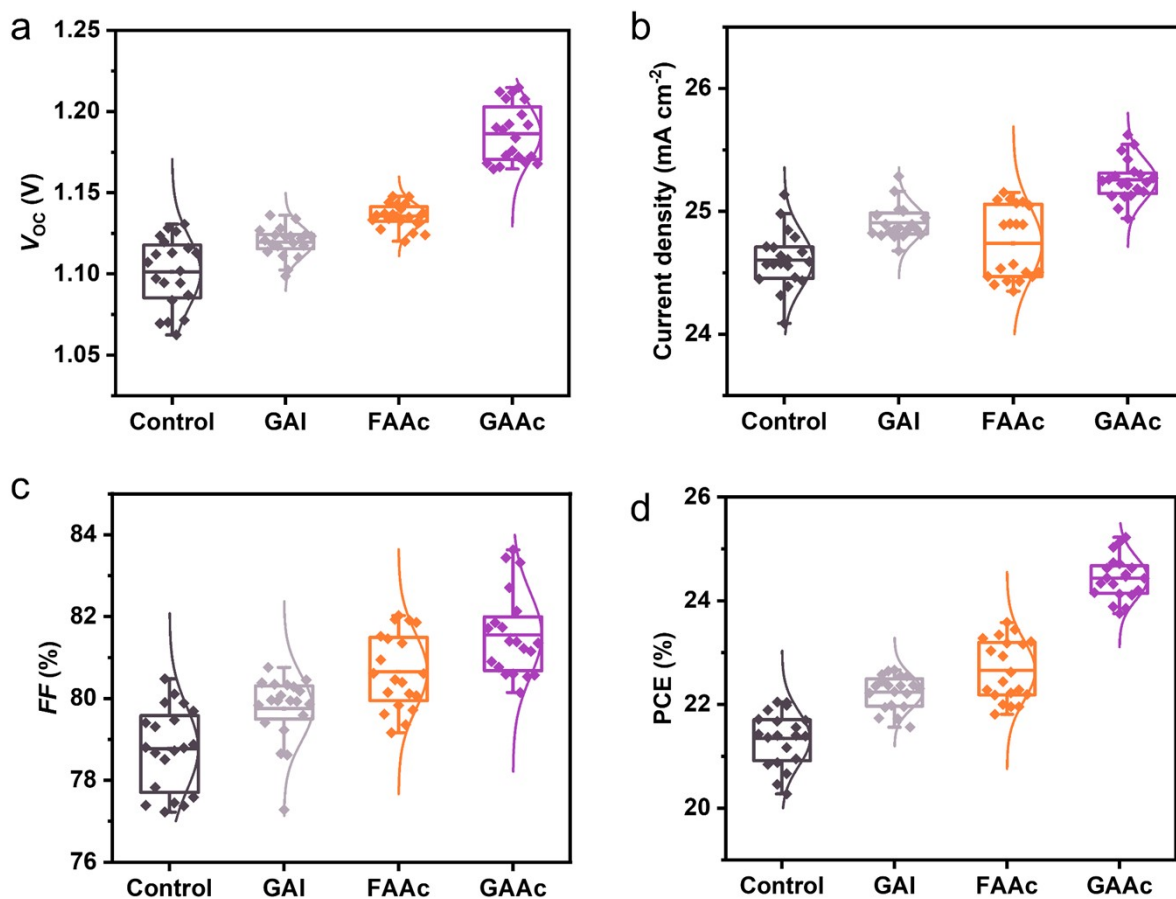

Fig. S15 Statistic diagram box of the photovoltaic parameters of the control, GAI, FAAC, and GAAC treated PSCs. (a)  $V_{oc}$ , (b)  $J_{sc}$ , (c) FF, and (d) PCE.

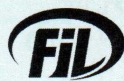

福建省计量科学研究院  
FUJIAN METROLOGY INSTITUTE  
(国家光伏产业计量测试中心)  
National PV Industry Measurement and Testing Center

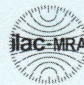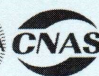

中国认可  
国际互认  
检测  
TESTING  
CNAS L0131

# 检测报告

Test Report

报告编号: 22Q3-00044

Report No.

|                              |                                                                   |
|------------------------------|-------------------------------------------------------------------|
| 客户名称<br>Name of Customer     | Zhanhua Wei Group, Huaqiao University                             |
| 联络信息<br>Contact Information  | No. 668 Jimei avenue, Xiamen 361021, Fujian Province. P. R. China |
| 物品名称<br>Name of items        | perovskite solar cell                                             |
| 型号/规格<br>Type /Specification | Pb-based perovskite solar cell                                    |
| 物品编号<br>Items No             | ZW2022-2                                                          |
| 制造厂商<br>Manufacturer         | Zhanhua Wei Group, Huaqiao University                             |
| 物品接收日期<br>Items Receipt Date | 2022-03-01                                                        |
| 检测日期<br>Test Date            | 2022-03-01                                                        |

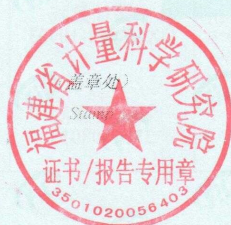

|                    |  |     |
|--------------------|--|-----|
| 批准人<br>Approved by |  | 黎健生 |
| 核验员<br>Checked by  |  | 何翔  |
| 检测员<br>Test by     |  | 陈彩云 |

发布日期 2022 年 03 月 04 日  
Date of Report Year month Day

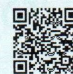

扫一扫 查真伪

|                                                                      |                                     |                                      |                         |
|----------------------------------------------------------------------|-------------------------------------|--------------------------------------|-------------------------|
| 本院/本中心地址: 福州市屏东东路 9-3 号<br>Address: 9-3 Pingdong Road, Fuzhou, China | 电话: 0591-87845050<br>Telephone      | 传真: 0591-87808417<br>Fax             | 邮编: 350003<br>Post Code |
| 网址: www.fjil.net<br>Web Site                                         | 咨询电话: 0591-87845050<br>Inquire line | 投诉电话: 0591-87823025<br>Complaint Tel |                         |

未经本院/本中心书面批准, 部分复制采用本报告内容无效。  
Partly using this Report will not be admitted unless allowed by FMI/ Center.

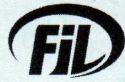

检测结果/说明:

Results of Test and additional explanation.

- 1 Standard Test Condition (STC): Total Irradiance: 1000 W/m<sup>2</sup>  
Temperature: 25.0 °C  
Spectral Distribution: AM1.5G

- 2 Measurement Data and I-V/P-V Curves under STC

Forward Scan

| $I_{sc}$<br>(mA) | $V_{oc}$<br>(V) | $I_{MPP}$<br>(mA) | $V_{MPP}$<br>(V) | $P_{MPP}$<br>(mW) | $FF$ (%) | $\eta$ (%) |
|------------------|-----------------|-------------------|------------------|-------------------|----------|------------|
| 3.055            | 1.162           | 2.832             | 0.9909           | 2.806             | 79.04    | 23.46      |

Reverse Scan

| $I_{sc}$<br>(mA) | $V_{oc}$<br>(V) | $I_{MPP}$<br>(mA) | $V_{MPP}$<br>(V) | $P_{MPP}$<br>(mW) | $FF$ (%) | $\eta$ (%) |
|------------------|-----------------|-------------------|------------------|-------------------|----------|------------|
| 3.058            | 1.166           | 2.890             | 1.005            | 2.904             | 81.44    | 24.28      |

Mismatch factor: 1.004

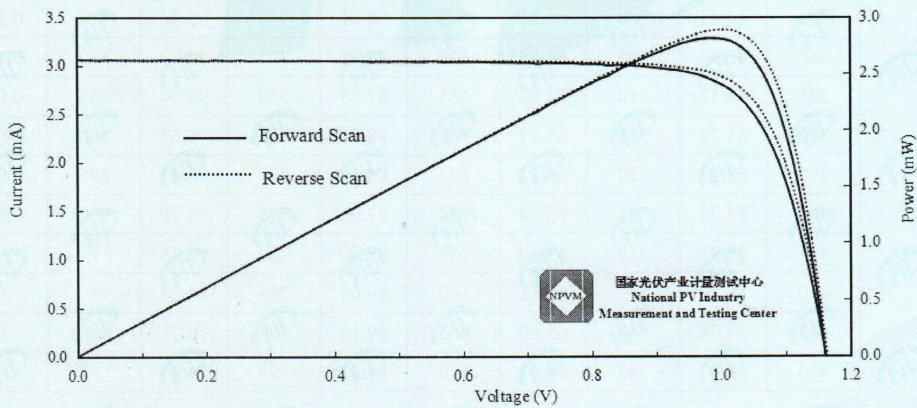

Figure 1. I-V and P-V characteristic curves of the measured sample under STC

**Fig. S16** Certified efficiencies by FUJIAN METROLOGY INSTITUTE, National PV Industry Measurement and Testing Center.

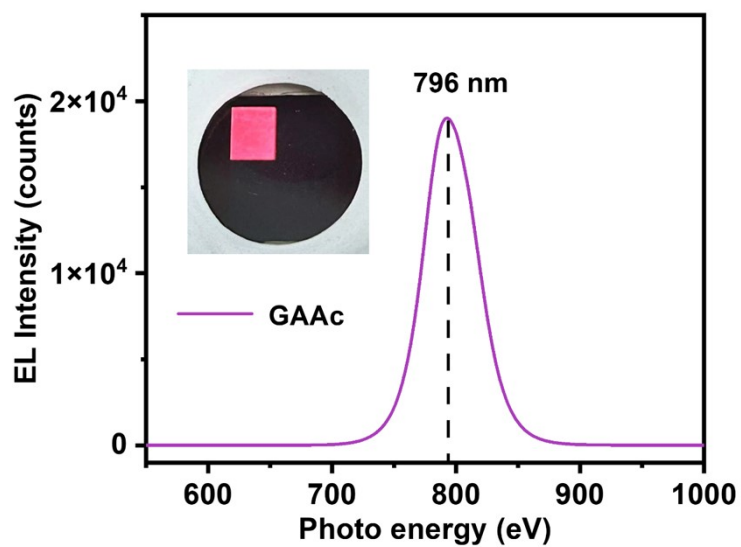

**Fig. S17** EL spectrum of the GAAC treated PSC device work as an LED.

**Table S1.** Carrier lifetime of the control, GAI, FAAc and GAAC treated perovskite films.

| Sample  | $\tau_1$ (ns) | $\tau_2$ (ns) | $A_1$  | $A_2$  | $\tau_{ave}$ (ns) |
|---------|---------------|---------------|--------|--------|-------------------|
| Control | 228.90        | 972.19        | 583.27 | 307.43 | 742.69            |
| GAI     | 253.94        | 1327.69       | 399.05 | 468.77 | 1177.34           |
| FAAc    | 268.87        | 1600.73       | 444.03 | 469.39 | 1418.13           |
| GAAC    | 285.27        | 2192.80       | 370.77 | 545.21 | 2037.76           |

**Table S2.** Integrated  $J_{SC}$  of the control, GAI, FAAc and GAAC treated PSCs.

| Sample                                     | Control | GAI   | FAAc  | GAAC  |
|--------------------------------------------|---------|-------|-------|-------|
| Integrated $J_{SC}$ (mA cm <sup>-2</sup> ) | 24.76   | 24.88 | 24.78 | 24.91 |

**Table S3.** Detailed parameters for the hysteresis effect of the PSCs.

|                            | $V_{OC}$ (V) | FF (%) | $J_{SC}$ (mA cm <sup>-2</sup> ) | PCE (%) | Hysteresis (%) |
|----------------------------|--------------|--------|---------------------------------|---------|----------------|
| Control <sub>Forward</sub> | 1.09         | 76.60  | 25.09                           | 20.87   | 3.8            |
| Control <sub>Reverse</sub> | 1.10         | 78.53  | 25.16                           | 21.69   |                |
| GAI <sub>Forward</sub>     | 1.11         | 78.61  | 25.02                           | 21.84   | 3.0            |
| GAI <sub>Reverse</sub>     | 1.12         | 79.96  | 25.10                           | 22.52   |                |
| FAAc <sub>Forward</sub>    | 1.12         | 79.51  | 25.07                           | 22.36   | 3.5            |
| FAAc <sub>Reverse</sub>    | 1.14         | 80.94  | 25.10                           | 23.18   |                |
| GAAC <sub>Forward</sub>    | 1.17         | 82.77  | 25.25                           | 24.44   | 0.7            |
| GAAC <sub>Reverse</sub>    | 1.17         | 82.98  | 25.27                           | 24.61   |                |

**Reference**

1. T. S. Sherkar, C. Momblona, L. Gil-Escrig, J. Ávila, M. Sessolo, H. J. Bolink and L. J. A. Koster, *ACS Energy Letters*, 2017, **2**, 1214-1222.
2. T. Ding, R. Li, W. Kong, B. Zhang and H. Wu, *Applied Surface Science*, 2015, **357**, 1743-1746.
3. G. Kresse and J. Furthmüller, *Physical Review B*, 1996, **54**, 11169-11186.
4. M. Szafranski and A. Katrusiak, *Physical Review B*, 2000, **61**, 1026-1035.
